# Supplementary material
Source: MDPI journal article supplement (https://www.mdpi.com/1424-2818/15/1/44)
Supplement: s1 [file s1]

**Table S1.** List of protist species and infraspecies taxa found in the Lake Kislo-Sladkoe via microscopy. Designations: «+» - active diversity, «\*» – hidden diversity.

| №                                                                   | Taxa                                                                              | Figures | Year, depths (m) |     |   |     |   |     |   |     |     |   |   |     | Year, depths (m) |     |   |     |   |     |   |     |  |  |  |  |
|---------------------------------------------------------------------|-----------------------------------------------------------------------------------|---------|------------------|-----|---|-----|---|-----|---|-----|-----|---|---|-----|------------------|-----|---|-----|---|-----|---|-----|--|--|--|--|
|                                                                     |                                                                                   |         | 2018             |     |   |     |   |     |   |     |     |   |   |     | 2021             |     |   |     |   |     |   |     |  |  |  |  |
|                                                                     |                                                                                   |         | 0                | 0.5 | 1 | 1.5 | 2 | 2.5 | 3 | 3.1 | 3.5 | 4 | 0 | 0.5 | 1                | 1.5 | 2 | 2.5 | 3 | 3.5 | 4 | 4.5 |  |  |  |  |
| AMORPHEA Adl et al., 2012                                           |                                                                                   |         |                  |     |   |     |   |     |   |     |     |   |   |     |                  |     |   |     |   |     |   |     |  |  |  |  |
| Amoebozoa Luhe 1913, sensu Cavalier-Smith 1998                      |                                                                                   |         |                  |     |   |     |   |     |   |     |     |   |   |     |                  |     |   |     |   |     |   |     |  |  |  |  |
| * Discosea Cavalier-Smith et al. 2004, sensu Smirnov et al. 2011    |                                                                                   |         |                  |     |   |     |   |     |   |     |     |   |   |     |                  |     |   |     |   |     |   |     |  |  |  |  |
| **Centramoebia Cavalier-Smith et al. 2016                           |                                                                                   |         |                  |     |   |     |   |     |   |     |     |   |   |     |                  |     |   |     |   |     |   |     |  |  |  |  |
| ***Himatismenida Page 1987                                          |                                                                                   |         |                  |     |   |     |   |     |   |     |     |   |   |     |                  |     |   |     |   |     |   |     |  |  |  |  |
| 1                                                                   | <i>Cochliopodium</i> sp.                                                          |         | *                | *   |   |     |   |     |   |     |     |   |   | *   |                  |     |   |     |   |     |   |     |  |  |  |  |
| 2                                                                   | Unidentified Amoebozoa                                                            |         |                  |     | + | +   | + | +   |   |     |     |   | * | *   |                  | *   |   |     | * |     | * | *   |  |  |  |  |
| Obazoa Brown et al., 2013                                           |                                                                                   |         |                  |     |   |     |   |     |   |     |     |   |   |     |                  |     |   |     |   |     |   |     |  |  |  |  |
| *Apusomonadida Karpov & Mylnikov 1989                               |                                                                                   |         |                  |     |   |     |   |     |   |     |     |   |   |     |                  |     |   |     |   |     |   |     |  |  |  |  |
| 3                                                                   | <i>Amastigomonas caudata</i> Zhukov 1975                                          | 2a      |                  |     |   |     |   |     |   |     |     |   |   | *   |                  |     |   |     |   |     |   |     |  |  |  |  |
| 4                                                                   | <i>Amastigomonas</i> cf. <i>mutabilis</i> (Griessmann, 1913) Molina et Nerad 1991 | 2b      | +                |     |   |     | * | *   |   |     | *   |   |   |     |                  |     |   |     |   |     |   |     |  |  |  |  |
| Opisthokonta Cavalier-Smith 1987, emend. Adl et al. 2005            |                                                                                   |         |                  |     |   |     |   |     |   |     |     |   |   |     |                  |     |   |     |   |     |   |     |  |  |  |  |
| *Holozoa Lang et al. 2002                                           |                                                                                   |         |                  |     |   |     |   |     |   |     |     |   |   |     |                  |     |   |     |   |     |   |     |  |  |  |  |
| **Choanoflagellata Kent 1880–1882                                   |                                                                                   |         |                  |     |   |     |   |     |   |     |     |   |   |     |                  |     |   |     |   |     |   |     |  |  |  |  |
| ***Acanthoecida Cavalier-Smith 1997, emend. Nitsche et al. 2011     |                                                                                   |         |                  |     |   |     |   |     |   |     |     |   |   |     |                  |     |   |     |   |     |   |     |  |  |  |  |
| ****Acanthoecidae Norris 1965, emend. sensu Nitsche et al. 2011     |                                                                                   |         |                  |     |   |     |   |     |   |     |     |   |   |     |                  |     |   |     |   |     |   |     |  |  |  |  |
| 5                                                                   | <i>Savillea parva</i> (Ellis, 1929) Loeblich, 1967                                | 2f      |                  |     |   |     |   |     |   |     |     |   |   |     |                  |     |   |     |   | *   |   |     |  |  |  |  |
| ****Stephanoecidae Leadbeater 2011                                  |                                                                                   |         |                  |     |   |     |   |     |   |     |     |   |   |     |                  |     |   |     |   |     |   |     |  |  |  |  |
| 6                                                                   | <i>Diaphanoeca grandis</i> Ellis 1930                                             | 2j-l    |                  |     |   |     |   |     |   |     |     |   |   |     |                  | *   |   | *   |   |     | * |     |  |  |  |  |
| 7                                                                   | <i>Stephanoeca</i> sp. 1                                                          | 2g, h   |                  |     |   |     |   |     |   |     |     | * | * | *   | *                | *   | * | *   |   | *   |   |     |  |  |  |  |
| 8                                                                   | <i>Stephanoeca</i> sp.2                                                           | 2i      |                  |     |   |     |   |     |   |     |     |   | * |     |                  |     |   |     |   |     |   |     |  |  |  |  |
| ***Craspedida Cavalier-Smith 1997, emend. Nitsche et al. 2011       |                                                                                   |         |                  |     |   |     |   |     |   |     |     |   |   |     |                  |     |   |     |   |     |   |     |  |  |  |  |
| ****Salpingoecidae Kent 1880–1882, emend. sensu Nitsche et al. 2011 |                                                                                   |         |                  |     |   |     |   |     |   |     |     |   |   |     |                  |     |   |     |   |     |   |     |  |  |  |  |
| 9                                                                   | <i>Monosiga ovata</i> Kent 1881                                                   | 2d      | *                | *   | * | *   | * | +   |   |     |     |   | * |     |                  | *   |   |     |   |     |   |     |  |  |  |  |
| 10                                                                  | <i>Salpingoeca</i> sp.                                                            | 2e      |                  |     |   |     |   |     |   |     | *   |   | * |     |                  |     |   |     |   |     |   |     |  |  |  |  |
| **Filasterea Shalchian-Tabrizi et al. 2008                          |                                                                                   |         |                  |     |   |     |   |     |   |     |     |   |   |     |                  |     |   |     |   |     |   |     |  |  |  |  |
| 11                                                                  | <i>Ministeria</i> sp.                                                             | 2c      | *                | *   |   |     |   |     |   |     |     | * |   | *   |                  |     |   |     |   |     |   |     |  |  |  |  |
| DIAPHORETICKES Adl et al., 2012                                     |                                                                                   |         |                  |     |   |     |   |     |   |     |     |   |   |     |                  |     |   |     |   |     |   |     |  |  |  |  |
| Archaeplastida Adl et al. 2005                                      |                                                                                   |         |                  |     |   |     |   |     |   |     |     |   |   |     |                  |     |   |     |   |     |   |     |  |  |  |  |
| *Chloroplastida Adl et al. 2005                                     |                                                                                   |         |                  |     |   |     |   |     |   |     |     |   |   |     |                  |     |   |     |   |     |   |     |  |  |  |  |
| **Chlorophyta Pascher 1914, emend. Lewis & McCourt 2004             |                                                                                   |         |                  |     |   |     |   |     |   |     |     |   |   |     |                  |     |   |     |   |     |   |     |  |  |  |  |
| 12                                                                  | Unidentified Chlorophyta 1                                                        |         |                  |     |   | +   | + |     |   |     |     |   |   |     |                  |     |   |     |   |     |   |     |  |  |  |  |
| 13                                                                  | Unidentified Chlorophyta 2                                                        | 9h      |                  |     |   |     |   |     |   |     |     |   |   |     |                  | *   |   |     |   |     |   |     |  |  |  |  |
| SAR Burki et al. 2008, emend. Adl et al. 2012                       |                                                                                   |         |                  |     |   |     |   |     |   |     |     |   |   |     |                  |     |   |     |   |     |   |     |  |  |  |  |
| *Stramenopiles Patterson 1989, emend. Adl et al. 2005               |                                                                                   |         |                  |     |   |     |   |     |   |     |     |   |   |     |                  |     |   |     |   |     |   |     |  |  |  |  |

| №                                                                    | Taxa                                                                                  | Figures | Year, depths (m) |     |   |     |   |     |   |     |     |   |   |     | Year, depths (m) |     |   |     |   |     |   |     |  |  |  |  |
|----------------------------------------------------------------------|---------------------------------------------------------------------------------------|---------|------------------|-----|---|-----|---|-----|---|-----|-----|---|---|-----|------------------|-----|---|-----|---|-----|---|-----|--|--|--|--|
|                                                                      |                                                                                       |         | 2018             |     |   |     |   |     |   |     |     |   |   |     | 2021             |     |   |     |   |     |   |     |  |  |  |  |
|                                                                      |                                                                                       |         | 0                | 0.5 | 1 | 1.5 | 2 | 2.5 | 3 | 3.1 | 3.5 | 4 | 0 | 0.5 | 1                | 1.5 | 2 | 2.5 | 3 | 3.5 | 4 | 4.5 |  |  |  |  |
| **Bigyra Cavalier-Smith 1998, emend. 2006                            |                                                                                       |         |                  |     |   |     |   |     |   |     |     |   |   |     |                  |     |   |     |   |     |   |     |  |  |  |  |
| ***Opalozoa Cavalier Smith 1991, emend. 2006                         |                                                                                       |         |                  |     |   |     |   |     |   |     |     |   |   |     |                  |     |   |     |   |     |   |     |  |  |  |  |
| ****Bicosoecida Grasse 1926, emend. Karpov 1998                      |                                                                                       |         |                  |     |   |     |   |     |   |     |     |   |   |     |                  |     |   |     |   |     |   |     |  |  |  |  |
| 14                                                                   | <i>Caecitellus parvulus</i> (Griessmann 1913)<br>Patterson et al. 1998                | 3c      |                  |     |   |     |   |     |   |     |     |   |   |     |                  |     | * | *   |   |     | * |     |  |  |  |  |
| 15                                                                   | <i>Pseudobodo tremulans</i> Griessmann 1913                                           |         |                  |     |   |     |   | +   |   |     |     |   |   |     |                  |     |   |     |   |     |   |     |  |  |  |  |
| 16                                                                   | <i>Cafeteria</i> sp.                                                                  |         |                  |     |   |     |   |     | + |     |     |   |   |     |                  |     |   |     |   |     |   |     |  |  |  |  |
| 17                                                                   | <i>Bicosoeca</i> cf. <i>maris</i> Picken 1841                                         | 3d      |                  |     |   |     |   |     | * |     |     |   |   |     |                  |     |   |     |   |     |   |     |  |  |  |  |
| **Gyrista Cavalier-Smith, 1998                                       |                                                                                       |         |                  |     |   |     |   |     |   |     |     |   |   |     |                  |     |   |     |   |     |   |     |  |  |  |  |
| ***Developea Karpov et Aleoshin 2016                                 |                                                                                       |         |                  |     |   |     |   |     |   |     |     |   |   |     |                  |     |   |     |   |     |   |     |  |  |  |  |
| 18                                                                   | <i>Developayella</i> cf. <i>elegans</i> Tong 1995                                     |         |                  |     |   |     |   |     |   |     |     |   |   |     |                  | *   | * |     |   |     |   | *   |  |  |  |  |
| ***Ochrophyta Cavalier-Smith 1986, emend. Cavalier-Smith & Chao 1996 |                                                                                       |         |                  |     |   |     |   |     |   |     |     |   |   |     |                  |     |   |     |   |     |   |     |  |  |  |  |
| ****Chrysista Cavalier-Smith 1986                                    |                                                                                       |         |                  |     |   |     |   |     |   |     |     |   |   |     |                  |     |   |     |   |     |   |     |  |  |  |  |
| *****Chrysophyceae Pascher 1914                                      |                                                                                       |         |                  |     |   |     |   |     |   |     |     |   |   |     |                  |     |   |     |   |     |   |     |  |  |  |  |
| 19                                                                   | Unidentified Chrysophyceae                                                            |         | +                | +   | + | +   | + | +   | + | +   |     | + |   |     |                  |     |   |     |   |     |   |     |  |  |  |  |
| *****Chromulinales Pascher 1910                                      |                                                                                       |         |                  |     |   |     |   |     |   |     |     |   |   |     |                  |     |   |     |   |     |   |     |  |  |  |  |
| 20                                                                   | <i>Kephyrion</i> sp.                                                                  | 9i      |                  |     |   | +   |   |     |   |     |     |   |   |     |                  |     |   |     |   |     |   |     |  |  |  |  |
| *****Ochromonadales Pascher 1910                                     |                                                                                       |         |                  |     |   |     |   |     |   |     |     |   |   |     |                  |     |   |     |   |     |   |     |  |  |  |  |
| 21                                                                   | <i>Spumella</i> -like flagellates                                                     |         | +                | +   | + | +   | + |     |   | +   | +   |   | * | *   | *                | *   | * | *   |   | *   | * | *   |  |  |  |  |
| *****Paraphysomonadida Scoble & Cavalier-Smith 2014                  |                                                                                       |         |                  |     |   |     |   |     |   |     |     |   |   |     |                  |     |   |     |   |     |   |     |  |  |  |  |
| 22                                                                   | <i>Clathromonas butcheri</i> (Pennick and Clarke 1972) Scoble and Cavalier-Smith 2014 | 4d,e    |                  |     |   |     |   |     |   |     |     |   |   |     | +                | +   |   | +   |   |     |   |     |  |  |  |  |
| 23                                                                   | <i>Paraphysomonas cyllicophora</i> Leadbeater 1972                                    | 4f      |                  |     |   |     |   |     |   |     |     |   | + |     | +                | +   |   | +   |   |     |   |     |  |  |  |  |
| 24                                                                   | <i>Paraphysomonas foraminifera</i> Lucas 1967                                         | 4c      |                  |     |   |     |   |     |   |     |     |   |   |     | +                | +   |   |     |   |     |   |     |  |  |  |  |
| 25                                                                   | <i>Paraphysomonas vestita</i> (Stokes 1885) De Saedeleer (1929)                       | 4b      |                  |     |   |     |   |     |   |     |     |   |   | +   | +                | +   |   | +   |   |     |   |     |  |  |  |  |
| 26                                                                   | <i>Paraphysomonas</i> sp.                                                             | 4a      | +                | +   | + | +   | + | +   | + | +   | +   | + |   |     |                  |     |   |     |   |     |   |     |  |  |  |  |
| ****Diatomista Derelle et al., 2016                                  |                                                                                       |         |                  |     |   |     |   |     |   |     |     |   |   |     |                  |     |   |     |   |     |   |     |  |  |  |  |
| *****Diatomeae Dumortier 1821                                        |                                                                                       |         |                  |     |   |     |   |     |   |     |     |   |   |     |                  |     |   |     |   |     |   |     |  |  |  |  |
| 27                                                                   | <i>Melosira nummuloides</i> C.Agardh 1824                                             | 7g-j    |                  |     |   |     |   |     |   |     |     |   |   |     |                  |     | * |     |   |     |   |     |  |  |  |  |
| 28                                                                   | <i>Paralia</i> sp.                                                                    | 8k      |                  |     |   |     |   |     |   |     |     | + |   |     |                  |     |   |     |   |     |   |     |  |  |  |  |
| 29                                                                   | <i>Podosira stelligera</i> (Bailey) A.Mann 1907                                       | 7k      |                  |     |   | *   | * |     |   |     |     |   |   |     |                  |     |   |     |   |     |   |     |  |  |  |  |
| 30                                                                   | <i>Chaetoceros</i> sp.1                                                               | 7d,e    |                  |     |   |     |   |     |   |     |     |   |   |     | +                | +   | * |     |   |     |   |     |  |  |  |  |
| 31                                                                   | <i>Chaetoceros</i> sp.2                                                               | 7f      |                  |     |   |     | + |     |   |     |     | + |   |     |                  |     |   |     |   |     |   |     |  |  |  |  |
| 32                                                                   | <i>Cyclotella choctawhatcheeana</i> Prasad 1990                                       | 7a,b    | +                | +   | + | +   | + |     |   |     |     | + |   |     | +                | +   |   | +   | + |     | + |     |  |  |  |  |
| 33                                                                   | <i>Cyclotella meneghiniana</i> Kützing 1844                                           | 7c      |                  |     |   |     |   |     |   |     |     |   |   |     |                  |     | * |     |   |     |   |     |  |  |  |  |
| 34                                                                   | <i>Amphora micrometra</i> M.H.Giffen 1967                                             | 8s,t    | *                | *   |   |     |   |     |   |     |     | * |   |     |                  |     | * |     |   |     |   |     |  |  |  |  |

| №                                              | Taxa                                                                       | Figures  | Year, depths (m) |     |   |     |   |     |   |     |     |   | Year, depths (m) |     |   |     |   |     |   |     |   |     |
|------------------------------------------------|----------------------------------------------------------------------------|----------|------------------|-----|---|-----|---|-----|---|-----|-----|---|------------------|-----|---|-----|---|-----|---|-----|---|-----|
|                                                |                                                                            |          | 2018             |     |   |     |   |     |   |     |     |   | 2021             |     |   |     |   |     |   |     |   |     |
|                                                |                                                                            |          | 0                | 0.5 | 1 | 1.5 | 2 | 2.5 | 3 | 3.1 | 3.5 | 4 | 0                | 0.5 | 1 | 1.5 | 2 | 2.5 | 3 | 3.5 | 4 | 4.5 |
| 35                                             | <i>Cocconeis placentula</i> Ehrenberg 1838                                 | 8r       |                  |     |   |     |   |     |   |     |     | + |                  |     |   |     |   |     |   |     |   |     |
| 36                                             | <i>Cocconeis placentula</i> var. <i>euglypta</i> (Ehrenberg) Cleve 1895    | 8q       |                  |     |   |     |   |     |   |     |     | + |                  |     |   | +   |   |     |   |     |   |     |
| 37                                             | <i>Entomoneis paludosa</i> var. <i>subsalina</i> (Cleve) Krammer 1987      | 8o       |                  |     |   |     |   |     |   |     |     |   | *                | *   | + | +   |   | +   | + |     |   |     |
| 38                                             | <i>Gomphonema parvulum</i> (Kützing) Kützing 1849                          | 8p       | *                | *   |   |     |   |     |   |     |     |   |                  |     |   |     |   |     |   |     |   |     |
| 39                                             | <i>Martyana atomus</i> (Hustedt) Snoeijs 1991                              | 8a       |                  |     |   |     |   |     |   |     |     | + |                  |     |   |     | * |     |   |     |   |     |
| 40                                             | <i>Nanofrustulum trainorii</i> (E.Morales) E.Morales 2019                  | 8b       | +                | +   | + | +   | + |     |   |     |     | + |                  |     | + |     |   |     |   |     | + |     |
| 41                                             | <i>Navicula antonii</i> Lange-Bertalot 2000                                | 9a       |                  |     |   |     |   |     |   |     |     | + |                  |     | + |     |   |     |   |     |   |     |
| 42                                             | <i>Navicula gregaria</i> Donkin 1861                                       | 9b       |                  |     |   |     |   |     |   |     |     | + |                  |     |   |     |   |     |   |     |   |     |
| 43                                             | <i>Navicula</i> sp.                                                        | 9c       | +                | +   |   |     |   |     |   |     |     |   |                  |     |   |     |   |     |   |     |   |     |
| 44                                             | <i>Nitzschia microcephala</i> Grunow 1880                                  | 8l       |                  |     |   |     |   |     |   |     |     |   |                  |     |   |     | * |     |   |     |   |     |
| 45                                             | <i>Nitzschia paleacea</i> (Grunow) Grunow 1881                             | 8h       |                  |     |   |     | * | *   |   |     |     |   |                  |     |   |     |   |     |   |     |   |     |
| 46                                             | <i>Nitzschia sigma</i> (Kützing) W.Smith 1853                              | 8f,g     |                  |     |   |     |   |     |   |     |     | + |                  |     |   |     |   |     |   |     |   |     |
| 47                                             | <i>Planothidium</i> sp.                                                    | 8i,j,m,n |                  |     |   |     |   |     |   |     |     | + |                  |     |   |     | * |     |   |     |   |     |
| 48                                             | <i>Pseudostaurosira</i> cf. <i>elliptica</i> (Schumann) Edlund et al. 2006 | 8c,d     |                  |     |   |     |   |     |   |     |     | + |                  |     |   |     | * |     |   |     |   |     |
| 49                                             | <i>Staurosirella pinnata</i> (Ehrenberg) D.M.Williams et Round 1988        | 8e       |                  |     |   |     |   |     |   |     |     | + |                  |     |   |     |   |     |   |     |   |     |
| 50                                             | <i>Gyrosigma</i> sp.                                                       | 9g       |                  |     |   |     |   |     |   |     |     | + |                  |     |   |     |   |     |   |     | + |     |
| 51                                             | <i>Cylindrotheca closterium</i> (Ehrenberg) Reimann & J.C.Lewin 1964       | 9f       |                  |     |   |     |   |     |   |     |     | + |                  |     |   |     |   |     |   |     |   |     |
| 52                                             | <i>Surirella striata</i> Leuduger-Fortmorel 1879                           | 9d       |                  |     |   |     |   |     |   |     |     | + |                  |     |   |     |   |     |   |     |   |     |
| ****Dictyochophyceae Silva 1980                |                                                                            |          |                  |     |   |     |   |     |   |     |     |   |                  |     |   |     |   |     |   |     |   |     |
| *****Pedinellales Zimmermann et al. 1984       |                                                                            |          |                  |     |   |     |   |     |   |     |     |   |                  |     |   |     |   |     |   |     |   |     |
| 53                                             | <i>Actinomonas mirabilis</i> Kent 1880                                     | 3b       | +                | +   | + | +   | + |     |   |     |     |   |                  |     |   |     | * |     |   |     |   |     |
| 54                                             | <i>Pteridomonas danica</i> Patterson and Fenchel 1985                      | 3a       |                  |     |   |     |   |     |   |     |     |   | *                | *   |   | *   | * | *   | * | *   | * |     |
| *Alveolata Cavalier-Smith 1991                 |                                                                            |          |                  |     |   |     |   |     |   |     |     |   |                  |     |   |     |   |     |   |     |   |     |
| **Ciliophora Doflein 1901                      |                                                                            |          |                  |     |   |     |   |     |   |     |     |   |                  |     |   |     |   |     |   |     |   |     |
| ***Intramacronucleata Lynn 1996                |                                                                            |          |                  |     |   |     |   |     |   |     |     |   |                  |     |   |     |   |     |   |     |   |     |
| ****CONTHREEP Lynn in Adl et al. 2012          |                                                                            |          |                  |     |   |     |   |     |   |     |     |   |                  |     |   |     |   |     |   |     |   |     |
| *****Oligohymenophorea de Puytorac et al. 1974 |                                                                            |          |                  |     |   |     |   |     |   |     |     |   |                  |     |   |     |   |     |   |     |   |     |
| 55                                             | <i>Cyclidium</i> sp.                                                       | 6e       |                  |     |   |     |   |     |   |     |     |   |                  | *   |   |     | + | +   | + | *   | + | +   |
| 56                                             | <i>Uronema</i> sp.                                                         | 6c       |                  |     |   |     |   |     |   |     |     |   |                  |     |   |     |   |     |   |     | + |     |
| 57                                             | <i>Vorticella</i> sp.                                                      |          |                  |     |   |     |   |     |   |     |     |   |                  | *   |   |     |   |     |   |     |   |     |

| №                                                                                  | Taxa                                                                              | Figures | Year, depths (m) |     |   |     |   |     |   |     |     |   |   |     | Year, depths (m) |     |   |     |   |     |   |     |  |  |  |  |
|------------------------------------------------------------------------------------|-----------------------------------------------------------------------------------|---------|------------------|-----|---|-----|---|-----|---|-----|-----|---|---|-----|------------------|-----|---|-----|---|-----|---|-----|--|--|--|--|
|                                                                                    |                                                                                   |         | 2018             |     |   |     |   |     |   |     |     |   |   |     | 2021             |     |   |     |   |     |   |     |  |  |  |  |
|                                                                                    |                                                                                   |         | 0                | 0.5 | 1 | 1.5 | 2 | 2.5 | 3 | 3.1 | 3.5 | 4 | 0 | 0.5 | 1                | 1.5 | 2 | 2.5 | 3 | 3.5 | 4 | 4.5 |  |  |  |  |
| ****Prostomatea Schewiakoff 1896                                                   |                                                                                   |         |                  |     |   |     |   |     |   |     |     |   |   |     |                  |     |   |     |   |     |   |     |  |  |  |  |
| 58                                                                                 | <i>Prorodon</i> sp.                                                               | 6f      |                  |     |   |     |   | +   | + | *   | *   | * |   |     |                  |     |   |     |   |     |   |     |  |  |  |  |
| ****Plagiopylea Small & Lynn 1985                                                  |                                                                                   |         |                  |     |   |     |   |     |   |     |     |   |   |     |                  |     |   |     |   |     |   |     |  |  |  |  |
| 59                                                                                 | <i>Plagiopyla</i> sp.                                                             | 6b      |                  |     |   |     |   |     | * | *   | *   | * |   |     |                  |     |   |     |   |     |   |     |  |  |  |  |
| ****SAL Gentekaki et al. 2014                                                      |                                                                                   |         |                  |     |   |     |   |     |   |     |     |   |   |     |                  |     |   |     |   |     |   |     |  |  |  |  |
| ****Spirotrichea Butschli 1889                                                     |                                                                                   |         |                  |     |   |     |   |     |   |     |     |   |   |     |                  |     |   |     |   |     |   |     |  |  |  |  |
| 60                                                                                 | <i>Oxytricha</i> sp.                                                              | 6h      |                  |     |   |     |   |     |   |     |     |   |   | *   |                  |     |   |     |   |     |   |     |  |  |  |  |
| 61                                                                                 | <i>Euplotes</i> sp.                                                               | 6g      |                  |     |   |     |   |     |   |     |     |   |   |     |                  | +   |   |     |   | +   | * |     |  |  |  |  |
| ****Lamellicorticata Vd’áčný et al. 2010                                           |                                                                                   |         |                  |     |   |     |   |     |   |     |     |   |   |     |                  |     |   |     |   |     |   |     |  |  |  |  |
| *****Armophorea Lynn 2004                                                          |                                                                                   |         |                  |     |   |     |   |     |   |     |     |   |   |     |                  |     |   |     |   |     |   |     |  |  |  |  |
| 62                                                                                 | <i>Metopus</i> sp.                                                                | 6a      |                  |     |   |     |   |     |   |     |     | * |   |     |                  |     |   |     |   |     |   |     |  |  |  |  |
| Incertae sedis SAL: Mesodiniidae Jankowski, 1980                                   |                                                                                   |         |                  |     |   |     |   |     |   |     |     |   |   |     |                  |     |   |     |   |     |   |     |  |  |  |  |
| 63                                                                                 | <i>Mesodinium</i> sp.                                                             | 6d      |                  |     |   |     |   |     |   |     |     |   |   | +   | *                |     | + |     | * | *   |   |     |  |  |  |  |
| **Colponemida Cavalier-Smith 1993 emend. Adl et al. 2019                           |                                                                                   |         |                  |     |   |     |   |     |   |     |     |   |   |     |                  |     |   |     |   |     |   |     |  |  |  |  |
| ***Oxyrrhis Dujardin 1841                                                          |                                                                                   |         |                  |     |   |     |   |     |   |     |     |   |   |     |                  |     |   |     |   |     |   |     |  |  |  |  |
| 64                                                                                 | <i>Oxyrrhis marina</i> Dujardin 1841                                              | 5d, e   |                  |     |   |     |   |     |   |     |     | * | * |     |                  | +   | + | +   | + | +   | + | +   |  |  |  |  |
| **Dinoflagellata Butschli 1885, emend. Fensome et al. 1993, emend. Adl et al. 2005 |                                                                                   |         |                  |     |   |     |   |     |   |     |     |   |   |     |                  |     |   |     |   |     |   |     |  |  |  |  |
| ***Dinophyceae Pascher 1914                                                        |                                                                                   |         |                  |     |   |     |   |     |   |     |     |   |   |     |                  |     |   |     |   |     |   |     |  |  |  |  |
| 65                                                                                 | <i>Gymnodinium</i> sp.                                                            | 5c      |                  |     |   |     |   |     | + | +   | +   |   |   |     | +                | +   | * |     |   |     |   |     |  |  |  |  |
| 66                                                                                 | <i>Amphidinium crassum</i>                                                        | 5b      |                  |     |   |     |   |     |   |     |     |   |   |     |                  |     |   |     | * |     |   |     |  |  |  |  |
| 67                                                                                 | <i>Prorocentrum</i> sp.                                                           | 5a      |                  |     |   |     |   |     |   |     |     | + |   |     |                  |     |   |     |   |     |   |     |  |  |  |  |
| 68                                                                                 | <i>Scrippsiella trochoidea</i>                                                    | 5f, g   |                  |     |   |     |   | +   | + | +   | +   |   |   | +   | +                |     |   |     |   |     |   |     |  |  |  |  |
| *Rhizaria Cavalier-Smith 2002                                                      |                                                                                   |         |                  |     |   |     |   |     |   |     |     |   |   |     |                  |     |   |     |   |     |   |     |  |  |  |  |
| **Cercozoa Cavalier-Smith 1998, emend. Adl et al. 2005; emend. Cavalier-Smith 2018 |                                                                                   |         |                  |     |   |     |   |     |   |     |     |   |   |     |                  |     |   |     |   |     |   |     |  |  |  |  |
| ***Glissomonadida Howe & Cavalier-Smith 2009                                       |                                                                                   |         |                  |     |   |     |   |     |   |     |     |   |   |     |                  |     |   |     |   |     |   |     |  |  |  |  |
| ****Bodomorphidae Hollande 1952, emend. Cavalier-Smith in Howe et al. 2009         |                                                                                   |         |                  |     |   |     |   |     |   |     |     |   |   |     |                  |     |   |     |   |     |   |     |  |  |  |  |
| 69                                                                                 | <i>Bodomorpha reniformis</i> (Zhukov, Mylnikov & Moiseyev) Mylnikov & Karpov 2004 |         |                  |     |   |     |   |     |   |     |     |   |   |     |                  |     |   | *   |   |     |   |     |  |  |  |  |
| ***Imbricatea Cavalier-Smith 2011                                                  |                                                                                   |         |                  |     |   |     |   |     |   |     |     |   |   |     |                  |     |   |     |   |     |   |     |  |  |  |  |
| ****Silicofilosea Adl et al. 2005, emend. Adl et al. 2012                          |                                                                                   |         |                  |     |   |     |   |     |   |     |     |   |   |     |                  |     |   |     |   |     |   |     |  |  |  |  |
| *****Euglyphida Copeland 1956, emend. Cavalier-Smith 1997                          |                                                                                   |         |                  |     |   |     |   |     |   |     |     |   |   |     |                  |     |   |     |   |     |   |     |  |  |  |  |
| *****Cyphoderiidae de Saedeleer 1934                                               |                                                                                   |         |                  |     |   |     |   |     |   |     |     |   |   |     |                  |     |   |     |   |     |   |     |  |  |  |  |
| 70                                                                                 | <i>Cyphoderia</i> aff. <i>littoralis</i> Golemansky 1973                          | 4g-i    |                  |     |   |     |   |     |   |     |     |   |   |     |                  | *   |   |     |   |     |   |     |  |  |  |  |
| ***Thecofilosea Cavalier-Smith 2003, emend. Cavalier-Smith 2011                    |                                                                                   |         |                  |     |   |     |   |     |   |     |     |   |   |     |                  |     |   |     |   |     |   |     |  |  |  |  |
| ****Ebriacea Lemmermann 1901                                                       |                                                                                   |         |                  |     |   |     |   |     |   |     |     |   |   |     |                  |     |   |     |   |     |   |     |  |  |  |  |
| 71                                                                                 | <i>Ebria tripartita</i> (Shumann) Lemmermann 1899                                 | 3f      | +                | +   | + | +   | + |     | * |     | *   | * | + | +   | *                | +   | * |     |   |     |   |     |  |  |  |  |

| №                                                                             | Taxa                                                                                    | Figures  | Year, depths (m) |     |   |     |   |     |   |     |     |   |   |     | Year, depths (m) |     |   |     |   |     |   |     |  |  |  |  |
|-------------------------------------------------------------------------------|-----------------------------------------------------------------------------------------|----------|------------------|-----|---|-----|---|-----|---|-----|-----|---|---|-----|------------------|-----|---|-----|---|-----|---|-----|--|--|--|--|
|                                                                               |                                                                                         |          | 2018             |     |   |     |   |     |   |     |     |   |   |     | 2021             |     |   |     |   |     |   |     |  |  |  |  |
|                                                                               |                                                                                         |          | 0                | 0.5 | 1 | 1.5 | 2 | 2.5 | 3 | 3.1 | 3.5 | 4 | 0 | 0.5 | 1                | 1.5 | 2 | 2.5 | 3 | 3.5 | 4 | 4.5 |  |  |  |  |
| Incertae sedis Cercozoa: Discocelia Cavalier-Smith 2013                       |                                                                                         |          |                  |     |   |     |   |     |   |     |     |   |   |     |                  |     |   |     |   |     |   |     |  |  |  |  |
| 72                                                                            | <i>Discocelis saleuta</i> Vørs 1988                                                     | 3e       |                  |     |   |     |   |     |   |     |     |   |   |     | *                |     |   | *   |   |     |   |     |  |  |  |  |
| *Cryptista Adl et al. 2019                                                    |                                                                                         |          |                  |     |   |     |   |     |   |     |     |   |   |     |                  |     |   |     |   |     |   |     |  |  |  |  |
| **Cryptophyceae Pascher 1913, emend. Schoenichen 1925, emend. Adl et al. 2012 |                                                                                         |          |                  |     |   |     |   |     |   |     |     |   |   |     |                  |     |   |     |   |     |   |     |  |  |  |  |
| 73                                                                            | Unidentified Cryptophyceae                                                              |          |                  |     |   |     |   |     |   |     |     |   |   |     | +                |     | + |     |   |     |   |     |  |  |  |  |
| ***Cryptomonadales Pascher 1913                                               |                                                                                         |          |                  |     |   |     |   |     |   |     |     |   |   |     |                  |     |   |     |   |     |   |     |  |  |  |  |
| 74                                                                            | <i>Rhodomonas cf. baltica</i> Karsten 1898                                              | 5h, i, j |                  |     |   |     |   | +   | + | +   |     |   |   |     |                  |     |   |     |   |     |   |     |  |  |  |  |
| ***Cyathomonadacea Pringsheim 1944                                            |                                                                                         |          |                  |     |   |     |   |     |   |     |     |   |   |     |                  |     |   |     |   |     |   |     |  |  |  |  |
| 75                                                                            | <i>Goniomonas amphinema</i> Larsen et Patterson 1990                                    |          |                  |     |   |     |   |     |   |     |     |   |   |     |                  | *   |   |     | + |     |   |     |  |  |  |  |
| 76                                                                            | <i>Goniomonas truncata</i> (Fresenius, 1858) Stein 1878                                 |          |                  |     |   |     |   |     |   |     |     |   | * | *   |                  | *   | * |     |   |     |   |     |  |  |  |  |
| *Haptista Cavalier-Smith 2003                                                 |                                                                                         |          |                  |     |   |     |   |     |   |     |     |   |   |     |                  |     |   |     |   |     |   |     |  |  |  |  |
| **Centroplasthelida Febvre-Chevalier & Febvre 1984                            |                                                                                         |          |                  |     |   |     |   |     |   |     |     |   |   |     |                  |     |   |     |   |     |   |     |  |  |  |  |
| 77                                                                            | <i>Heterophrys</i> -like organism                                                       | 4j-k     |                  |     |   |     |   |     |   |     |     |   |   |     | *                | *   |   |     |   |     |   |     |  |  |  |  |
| **Haptophyta Hibberd 1976, ex. Edvardsen & Eikrem 2000                        |                                                                                         |          |                  |     |   |     |   |     |   |     |     |   |   |     |                  |     |   |     |   |     |   |     |  |  |  |  |
| 78                                                                            | Unidentified Haptophyta                                                                 | 9j       | +                | +   | + | +   | + |     |   |     |     |   | + | +   |                  |     |   |     |   |     |   |     |  |  |  |  |
| Incertae sedis Diaphoretickes                                                 |                                                                                         |          |                  |     |   |     |   |     |   |     |     |   |   |     |                  |     |   |     |   |     |   |     |  |  |  |  |
| Telonemia Shalchian-Tabrizi 2006                                              |                                                                                         |          |                  |     |   |     |   |     |   |     |     |   |   |     |                  |     |   |     |   |     |   |     |  |  |  |  |
| 79                                                                            | <i>Telonema</i> sp.                                                                     | 3g       |                  |     |   |     |   |     |   |     |     |   |   |     |                  |     | * |     |   |     |   |     |  |  |  |  |
| Incertae sedis EUKARYA: EXCAVATES                                             |                                                                                         |          |                  |     |   |     |   |     |   |     |     |   |   |     |                  |     |   |     |   |     |   |     |  |  |  |  |
| *Discoba Simpson in Hampl et al. 2009                                         |                                                                                         |          |                  |     |   |     |   |     |   |     |     |   |   |     |                  |     |   |     |   |     |   |     |  |  |  |  |
| **Euglenozoa Cavalier-Smith 1981, emend. Simpson 1997                         |                                                                                         |          |                  |     |   |     |   |     |   |     |     |   |   |     |                  |     |   |     |   |     |   |     |  |  |  |  |
| 80                                                                            | Unidentified Euglenozoa                                                                 | 9l       |                  |     |   |     |   |     |   |     | +   |   |   |     |                  |     |   |     |   |     |   |     |  |  |  |  |
| ***Euglenida Butschli 1884, emend. Simpson 1997                               |                                                                                         |          |                  |     |   |     |   |     |   |     |     |   |   |     |                  |     |   |     |   |     |   |     |  |  |  |  |
| ****Heteronematina Leedale 1967                                               |                                                                                         |          |                  |     |   |     |   |     |   |     |     |   |   |     |                  |     |   |     |   |     |   |     |  |  |  |  |
| 81                                                                            | <i>Neometanema exaratum</i> (Larsen and Patterson 1990) Lee and Simpson comb. nov. 2014 | 3q       |                  |     |   |     |   |     |   |     |     |   |   |     |                  |     |   |     | + |     |   |     |  |  |  |  |
| 82                                                                            | <i>Petalomonas poosilla</i> (Skuja 1948) Larsen and Patterson 1990                      | 3p       |                  |     |   |     |   |     |   |     | *   | * | * |     | *                |     |   |     |   |     |   |     |  |  |  |  |
| ****Euglenophyceae Schoenichen 1925, emend. Marin & Melkonian 2003            |                                                                                         |          |                  |     |   |     |   |     |   |     |     |   |   |     |                  |     |   |     |   |     |   |     |  |  |  |  |
| *****Euglenales Leedale 1967, emend. Marin & Melkonian 2003                   |                                                                                         |          |                  |     |   |     |   |     |   |     |     |   |   |     |                  |     |   |     |   |     |   |     |  |  |  |  |
| *****Euglenaceae Dujardin 1841, emend. Kim et al. 2010.                       |                                                                                         |          |                  |     |   |     |   |     |   |     |     |   |   |     |                  |     |   |     |   |     |   |     |  |  |  |  |
| 83                                                                            | <i>Trachelomonas intermedia</i> var. <i>minor</i> Tell                                  | 9e       |                  |     |   |     |   |     |   |     |     |   |   |     |                  |     | * |     |   |     |   |     |  |  |  |  |
| ***Kinetoplastea Honigberg 1963                                               |                                                                                         |          |                  |     |   |     |   |     |   |     |     |   |   |     |                  |     |   |     |   |     |   |     |  |  |  |  |
| ****Metakinetoplastina Vickerman in Moreira et al. 2004                       |                                                                                         |          |                  |     |   |     |   |     |   |     |     |   |   |     |                  |     |   |     |   |     |   |     |  |  |  |  |
| *****Neobodonida Vickerman in Moreira et al. 2004                             |                                                                                         |          |                  |     |   |     |   |     |   |     |     |   |   |     |                  |     |   |     |   |     |   |     |  |  |  |  |

[illegible]
